# Supplementary material
Source: PubMed Central journal article supplement (PMC4100991)
Supplement: cbt-15-906-s01.pdf [file cbt-15-906-s01.pdf]

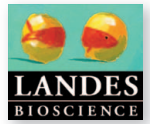

## **Supplemental Material to:**

**Eui Young So and Toru Ouchi**

**Decreased DNA repair activity in bone marrow due to low  
expression of DNA damage repair proteins**

**Cancer Biology & Therapy 2014; 15(7)**

**<http://dx.doi.org/10.4161/cbt.28883>**

**<http://www.landesbioscience.com/journals/cbt/article/28883/>**

**Table S1.**

| <b>Murine genes</b> | <b>Forward primers</b>       | <b>Reverse primers</b>       |
|---------------------|------------------------------|------------------------------|
| DNA-PKcs            | 5'TGGTGAACCCACAGAAGCTGAGAA3' | 5'AGCAGCGATTGGTTGCCTTCTCCT3' |
| ATM                 | 5'ACTGTACCAGCTTCTGCCTCAACA3' | 5'GCTAAGTGCCAAAGTCAAGCAGCA3' |
| ATR                 | 5'GGCTCTGAAGGTGCTGTTTA       | 5'GTCTCTGTGGATCACTCTCTTTG    |
| Ku70                | 5'TCAAGCAAGCTGGAAGACCTGCTA3' | 5'TGAACAAGGTTGAGCTCCCACTGA3' |
| Rad50               | 5'AGAGAAGCTGCAGATAGCCACCAA3' | 5'TCTTGCTCATGGTTCCTCATGTCT3' |
| SMC1                | 5'AGAGATGGCCAAGCGTCGTATTGA3' | 5'AAGGGCATTGCCACAAGCATACTG3' |
| NBS1                | 5'TGCCAAGCAGCACAAAGAACTCAG3' | 5'TTCCTAGAGCTTTGTTCCAGCCCA3' |
| BRAT1               | 5'TGTGAACCATGTGGATGAGTCCCT3' | 5'TAAGAAGAAGGTCCATGAGCGCGT3' |
| Chk1                | 5'TTACAGTCGCTGTGCTTGGAGTCA3' | 5'ACCTCTGAGCATCTGTTCAGGCA3'  |
| Chk2                | 5'AGGCAAACGCTGCCTCTGAGTAA3'  | 5'TCTCGATGAGCCAAGAGCAAACCT3' |
| DNA Ligase IV       | 5'AAGGATGGTGAAGATTCTGGCCT3'  | 5'TGAGACATCATGCCACCTCGTGAA3' |
| p53                 | 5'GCTTTGAGGTTCTGTTTGTGCCT3'  | 5'TCCTCTGTAGCATGGGCATCCTTT3' |
| GAPDH               | 5'AACTTTGGCATTGTGGAAGG3'     | 5'ACACATTGGGGGTAGGAACA3'     |
